# Supplementary material for: High-nitrogen-content energetic BNn+ (n = 4–16) clusters
Source: Royal Society of Chemistry journal article supplement (doi:10.1039/d4cp03566f), 2024-11-27
Supplement: d4cp03566f1.pdf [file d4cp03566f1.pdf]

## High-Nitrogen-Content Energetic $\text{BN}_n^+$ ( $n=4-16$ ) Clusters

Jiale Li,<sup>a,b</sup> Meicheng Chen,<sup>c</sup> Kaiwen Liu,<sup>d</sup> Kewei Ding,<sup>\*a,b</sup> Hongguang Xu,<sup>\*d</sup> Weijun Zheng<sup>d</sup> and Cheng Lu<sup>\*c</sup>

- Xi'an Modern Chemistry Research Institute, Xi'an 710065, China.
- State Key Laboratory of Fluorine & Nitrogen Chemical, Xi'an 710065, China.
- School of Mathematics and Physics, China university of Geosciences (Wuhan), Wuhan 430074, China.
- State Key Laboratory of Molecular Reaction Dynamics, Institute of chemistry, Chinese Academy of Sciences, Beijing 100190, China

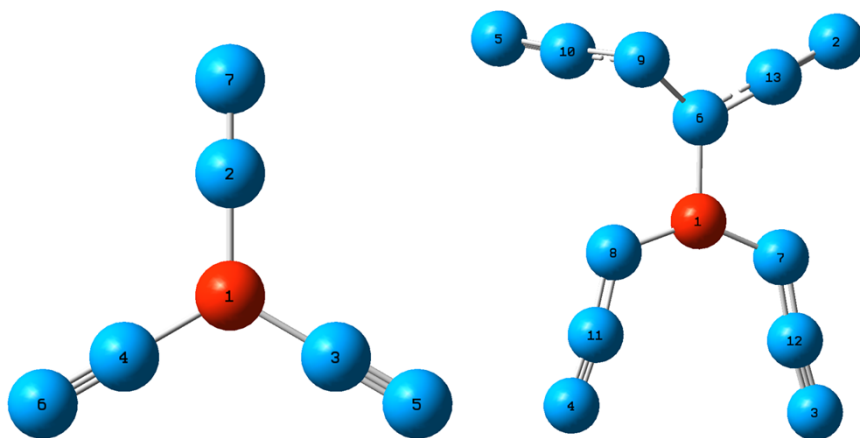

Fig. S1 The labels of B and N atom in lowest-energy structure of  $\text{BN}_6^+$  and  $\text{BN}_{12}^+$  cluster.

Table S1. Fuzzy bond order (FBO) and Wiberg bond order (WBO) of B-N and N-N bond in lowest-energy structure of  $\text{BN}_6^+$  cluster.

| Bond | B1-N2 | B1-N3 | B1-N4 | N2-N7 | N4-N6 | N3-N5 |
|------|-------|-------|-------|-------|-------|-------|
| FBO  | 1.09  | 1.09  | 1.09  | 2.74  | 2.74  | 2.74  |
| WBO  | 1.16  | 1.16  | 1.16  | 3.11  | 3.11  | 3.11  |

Table S2. Fuzzy bond order (FBO) and Wiberg bond order (WBO) of B-N and N-N bond in lowest-energy structure of  $\text{BN}_{12}^+$  cluster.

| Bond | B1-N6 | B1-N7 | B1-N8 | N6-N9 | N9-N10 | N10-N5 | N6-N13 | N13-N2 | N8-N11 | N11-N4 | N7-N12 | N12-N3 |
|------|-------|-------|-------|-------|--------|--------|--------|--------|--------|--------|--------|--------|
| FBO  | 0.87  | 1.22  | 1.23  | 1.18  | 0.14   | 2.66   | 1.40   | 2.71   | 1.66   | 2.63   | 1.66   | 2.63   |
| WBO  | 0.98  | 1.40  | 1.41  | 1.21  | 1.61   | 3.02   | 1.36   | 3.08   | 1.63   | 2.99   | 1.63   | 2.99   |
